# Supplementary material for: Synthesis and photophysical properties of rare earth complexes bearing silanediamido ligands Me2Si(NAryl)22− (Aryl = Dipp, Mes)
Source: Royal Society of Chemistry journal article supplement (doi:10.1039/d1nj05722g), 2021-12-17
Supplement: d1nj05722g1.pdf [file d1nj05722g1.pdf]

## Supplementary information

### Synthesis and photophysical properties of rare earth complexes bearing silanedi-amido ligands $\text{SiMe}_2(\text{NAr})_2^{2-}$ (Ar = Dipp, Mes)

Olga A. Mironova<sup>\*a</sup>, Daniil I. Lashchenko<sup>a,b</sup>, Aleksey A. Ryadun<sup>a</sup>, Taisiya S. Sukhikh<sup>a</sup>, Denis A. Bashirov<sup>\*a</sup>, Nikolay A. Pushkarevsky<sup>a</sup>, Sergey N. Konchenko<sup>a</sup>

Nikolaev Institute of Inorganic Chemistry SB RAS, Akademika Lavrentieva Ave. 3, 630090 Novosibirsk, Russia.

Department of Natural Sciences, Novosibirsk State University, Pirogova St. 2, 630090 Novosibirsk, Russia.

Corresponding authors at: Nikolaev Institute of Inorganic Chemistry SB RAS, Akademika Lavrentieva Ave. 3, 630090 Novosibirsk, Russia. E-mail: mironova@niic.nsc.ru (O.A. Mironova), bashirov@niic.nsc.ru (D.A. Bashirov)

#### Table of contents:

1. X-ray structural determination
2. NMR spectroscopy
3. Powder X-ray studies
4. Electronic absorption spectra
5. Luminescence study
6. Photos of the samples

# 1. X-ray structural determination

**Table S1** Crystal data and structure refinement for the compounds.

| Identification code                         | Y <sup>Dipp</sup>                                                                                             | Tb <sup>Dipp</sup>                                                                                             | Gd <sup>Dipp</sup>                                                                                             | Y <sup>Mes</sup>                                                                                             | Gd <sup>Mes</sup>                                                                                             | Tb <sup>Mes</sup>                                                                                             | 2Y <sup>Dipp</sup>                                                                                                            | 3Y <sup>Dipp</sup>                                                  |
|---------------------------------------------|---------------------------------------------------------------------------------------------------------------|----------------------------------------------------------------------------------------------------------------|----------------------------------------------------------------------------------------------------------------|--------------------------------------------------------------------------------------------------------------|---------------------------------------------------------------------------------------------------------------|---------------------------------------------------------------------------------------------------------------|-------------------------------------------------------------------------------------------------------------------------------|---------------------------------------------------------------------|
| Empirical formula                           | C <sub>68</sub> H <sub>112</sub> Cl <sub>2</sub> N <sub>4</sub> O <sub>4</sub> Si <sub>2</sub> Y <sub>2</sub> | C <sub>68</sub> H <sub>112</sub> Cl <sub>2</sub> N <sub>4</sub> O <sub>4</sub> Si <sub>2</sub> Tb <sub>2</sub> | C <sub>68</sub> H <sub>112</sub> Cl <sub>2</sub> N <sub>4</sub> O <sub>4</sub> Si <sub>2</sub> Sm <sub>2</sub> | C <sub>56</sub> H <sub>88</sub> Cl <sub>2</sub> N <sub>4</sub> O <sub>4</sub> Si <sub>2</sub> Y <sub>2</sub> | C <sub>56</sub> H <sub>88</sub> Cl <sub>2</sub> Gd <sub>2</sub> N <sub>4</sub> O <sub>4</sub> Si <sub>2</sub> | C <sub>56</sub> H <sub>88</sub> Cl <sub>2</sub> N <sub>4</sub> O <sub>4</sub> Si <sub>2</sub> Tb <sub>2</sub> | C <sub>88</sub> H <sub>152</sub> Cl <sub>4</sub> Li <sub>2</sub> N <sub>4</sub> O <sub>9</sub> Si <sub>2</sub> Y <sub>2</sub> | C <sub>38</sub> H <sub>64</sub> ClN <sub>2</sub> O <sub>3</sub> SiY |
| Formula weight                              | 1354.51                                                                                                       | 1494.53                                                                                                        | 1477.39                                                                                                        | 1186.20                                                                                                      | 1322.88                                                                                                       | 1326.22                                                                                                       | 1799.81                                                                                                                       | 749.36                                                              |
| Temperature/K                               | 150(2)                                                                                                        | 150(2)                                                                                                         | 150(2)                                                                                                         | 150(2)                                                                                                       | 150(2)                                                                                                        | 150(2)                                                                                                        | 150(2)                                                                                                                        | 150(2)                                                              |
| Crystal system                              | orthorhombic                                                                                                  | orthorhombic                                                                                                   | orthorhombic                                                                                                   | orthorhombic                                                                                                 | orthorhombic                                                                                                  | orthorhombic                                                                                                  | monoclinic                                                                                                                    | triclinic                                                           |
| Space group                                 | <i>Pbca</i>                                                                                                   | <i>Pbca</i>                                                                                                    | <i>Pbca</i>                                                                                                    | <i>Pbca</i>                                                                                                  | <i>Pbca</i>                                                                                                   | <i>Pbca</i>                                                                                                   | <i>P2<sub>1</sub>/n</i>                                                                                                       | <i>P-1</i>                                                          |
| a/Å                                         | 18.5551(16)                                                                                                   | 18.5890(3)                                                                                                     | 18.671(3)                                                                                                      | 17.2844(15)                                                                                                  | 17.3771(18)                                                                                                   | 17.3121(4)                                                                                                    | 12.6828(18)                                                                                                                   | 10.178(3)                                                           |
| b/Å                                         | 17.539(2)                                                                                                     | 17.5439(4)                                                                                                     | 17.547(2)                                                                                                      | 15.8628(15)                                                                                                  | 15.9355(13)                                                                                                   | 15.9196(4)                                                                                                    | 18.077(2)                                                                                                                     | 12.127(3)                                                           |
| c/Å                                         | 21.8449(17)                                                                                                   | 21.9363(4)                                                                                                     | 21.967(3)                                                                                                      | 21.879(2)                                                                                                    | 21.937(2)                                                                                                     | 21.8917(5)                                                                                                    | 21.843(3)                                                                                                                     | 16.974(4)                                                           |
| α/°                                         | 90                                                                                                            | 90                                                                                                             | 90                                                                                                             | 90                                                                                                           | 90                                                                                                            | 90                                                                                                            | 90                                                                                                                            | 97.009(8)                                                           |
| β/°                                         | 90                                                                                                            | 90                                                                                                             | 90                                                                                                             | 90                                                                                                           | 90                                                                                                            | 90                                                                                                            | 95.133(5)                                                                                                                     | 96.301(7)                                                           |
| γ/°                                         | 90                                                                                                            | 90                                                                                                             | 90                                                                                                             | 90                                                                                                           | 90                                                                                                            | 90                                                                                                            | 90                                                                                                                            | 106.915(7)                                                          |
| Volume/Å <sup>3</sup>                       | 7109.0(13)                                                                                                    | 7153.9(2)                                                                                                      | 7197.0(17)                                                                                                     | 5998.9(10)                                                                                                   | 6074.6(10)                                                                                                    | 6033.4(2)                                                                                                     | 4987.7(12)                                                                                                                    | 1966.2(9)                                                           |
| Z                                           | 4                                                                                                             | 4                                                                                                              | 4                                                                                                              | 4                                                                                                            | 4                                                                                                             | 4                                                                                                             | 2                                                                                                                             | 2                                                                   |
| ρ <sub>calc</sub> /cm <sup>-3</sup>         | 1.266                                                                                                         | 1.388                                                                                                          | 1.363                                                                                                          | 1.313                                                                                                        | 1.446                                                                                                         | 1.460                                                                                                         | 1.198                                                                                                                         | 1.266                                                               |
| μ/mm <sup>-1</sup>                          | 1.780                                                                                                         | 2.116                                                                                                          | 1.769                                                                                                          | 2.099                                                                                                        | 2.337                                                                                                         | 2.498                                                                                                         | 1.340                                                                                                                         | 1.618                                                               |
| F(000)                                      | 2880.0                                                                                                        | 3088.0                                                                                                         | 3064.0                                                                                                         | 2496.0                                                                                                       | 2696.0                                                                                                        | 2704.0                                                                                                        | 1920.0                                                                                                                        | 800.0                                                               |
| Crystal size/mm <sup>3</sup>                | 0.3 × 0.3 × 0.3                                                                                               | 0.32 × 0.32 × 0.26                                                                                             | 0.135 × 0.09 × 0.08                                                                                            | 0.2 × 0.2 × 0.1                                                                                              | 0.14 × 0.13 × 0.08                                                                                            | 0.15 × 0.15 × 0.1                                                                                             | 0.21 × 0.18 × 0.1                                                                                                             | 0.22 × 0.21 × 0.18                                                  |
| Radiation                                   | MoKα (λ = 0.71073)                                                                                            | MoKα (λ = 0.71073)                                                                                             | MoKα (λ = 0.71073)                                                                                             | MoKα (λ = 0.71073)                                                                                           | MoKα (λ = 0.71073)                                                                                            | MoKα (λ = 0.71073)                                                                                            | MoKα (λ = 0.71073)                                                                                                            | MoKα (λ = 0.71073)                                                  |
| 2θ range for data collection/°              | 4.328 to 50.116                                                                                               | 4.312 to 52.748                                                                                                | 4.302 to 51.36                                                                                                 | 3.952 to 48.808                                                                                              | 3.934 to 59.17                                                                                                | 5.092 to 55.772                                                                                               | 4.37 to 48.81                                                                                                                 | 2.446 to 48.81                                                      |
| Index ranges                                | -22 ≤ h ≤ 19, -17 ≤ k ≤ 20, -21 ≤ l ≤ 26                                                                      | -23 ≤ h ≤ 18, -12 ≤ k ≤ 21, -27 ≤ l ≤ 20                                                                       | -22 ≤ h ≤ 22, -21 ≤ k ≤ 21, -26 ≤ l ≤ 26                                                                       | -20 ≤ h ≤ 18, -18 ≤ k ≤ 18, -25 ≤ l ≤ 22                                                                     | -24 ≤ h ≤ 24, -21 ≤ k ≤ 21, -30 ≤ l ≤ 30                                                                      | -14 ≤ h ≤ 22, -20 ≤ k ≤ 17, -25 ≤ l ≤ 18                                                                      | -14 ≤ h ≤ 14, -17 ≤ k ≤ 21, -25 ≤ l ≤ 25                                                                                      | -11 ≤ h ≤ 11, -14 ≤ k ≤ 12, -19 ≤ l ≤ 19                            |
| Reflections collected                       | 27569                                                                                                         | 24694                                                                                                          | 62745                                                                                                          | 41594                                                                                                        | 55725                                                                                                         | 17555                                                                                                         | 44099                                                                                                                         | 15308                                                               |
| Independent reflections                     | 6278 [R <sub>int</sub> = 0.0574, R <sub>sigma</sub> = 0.0579]                                                 | 7292 [R <sub>int</sub> = 0.0364, R <sub>sigma</sub> = 0.0416]                                                  | 6832 [R <sub>int</sub> = 0.1006, R <sub>sigma</sub> = 0.0526]                                                  | 4931 [R <sub>int</sub> = 0.1127, R <sub>sigma</sub> = 0.0681]                                                | 8505 [R <sub>int</sub> = 0.0578, R <sub>sigma</sub> = 0.0370]                                                 | 6101 [R <sub>int</sub> = 0.0514, R <sub>sigma</sub> = 0.0529]                                                 | 8197 [R <sub>int</sub> = 0.1552, R <sub>sigma</sub> = 0.1291]                                                                 | 6425 [R <sub>int</sub> = 0.0760, R <sub>sigma</sub> = 0.1420]       |
| Data/restraints/parameter s                 | 6278/21/390                                                                                                   | 7292/15/390                                                                                                    | 6832/21/390                                                                                                    | 4931/0/324                                                                                                   | 8505/0/324                                                                                                    | 6101/0/324                                                                                                    | 8197/140/504                                                                                                                  | 6425/9/430                                                          |
| Goodness-of-fit on F <sup>2</sup>           | 1.007                                                                                                         | 1.010                                                                                                          | 1.280                                                                                                          | 1.011                                                                                                        | 1.021                                                                                                         | 1.026                                                                                                         | 1.059                                                                                                                         | 0.975                                                               |
| Final R indexes [I ≥ 2σ (I)]                | R <sub>1</sub> = 0.0375, wR <sub>2</sub> = 0.0809                                                             | R <sub>1</sub> = 0.0284, wR <sub>2</sub> = 0.0612                                                              | R <sub>1</sub> = 0.0619, wR <sub>2</sub> = 0.1504                                                              | R <sub>1</sub> = 0.0401, wR <sub>2</sub> = 0.0790                                                            | R <sub>1</sub> = 0.0266, wR <sub>2</sub> = 0.0574                                                             | R <sub>1</sub> = 0.0347, wR <sub>2</sub> = 0.0750                                                             | R <sub>1</sub> = 0.0743, wR <sub>2</sub> = 0.1676                                                                             | R <sub>1</sub> = 0.0546, wR <sub>2</sub> = 0.0867                   |
| Final R indexes [all data]                  | R <sub>1</sub> = 0.0758, wR <sub>2</sub> = 0.0920                                                             | R <sub>1</sub> = 0.0501, wR <sub>2</sub> = 0.0693                                                              | R <sub>1</sub> = 0.0923, wR <sub>2</sub> = 0.1704                                                              | R <sub>1</sub> = 0.0846, wR <sub>2</sub> = 0.0941                                                            | R <sub>1</sub> = 0.0384, wR <sub>2</sub> = 0.0639                                                             | R <sub>1</sub> = 0.0539, wR <sub>2</sub> = 0.0847                                                             | R <sub>1</sub> = 0.1385, wR <sub>2</sub> = 0.1976                                                                             | R <sub>1</sub> = 0.1151, wR <sub>2</sub> = 0.1020                   |
| Largest diff. peak/hole / e Å <sup>-3</sup> | 0.37/-0.37                                                                                                    | 0.92/-0.58                                                                                                     | 2.46/-1.57                                                                                                     | 0.32/-0.52                                                                                                   | 0.81/-0.41                                                                                                    | 0.61/-0.39                                                                                                    | 1.00/-0.57                                                                                                                    | 0.40/-0.53                                                          |

## 2. NMR spectroscopy

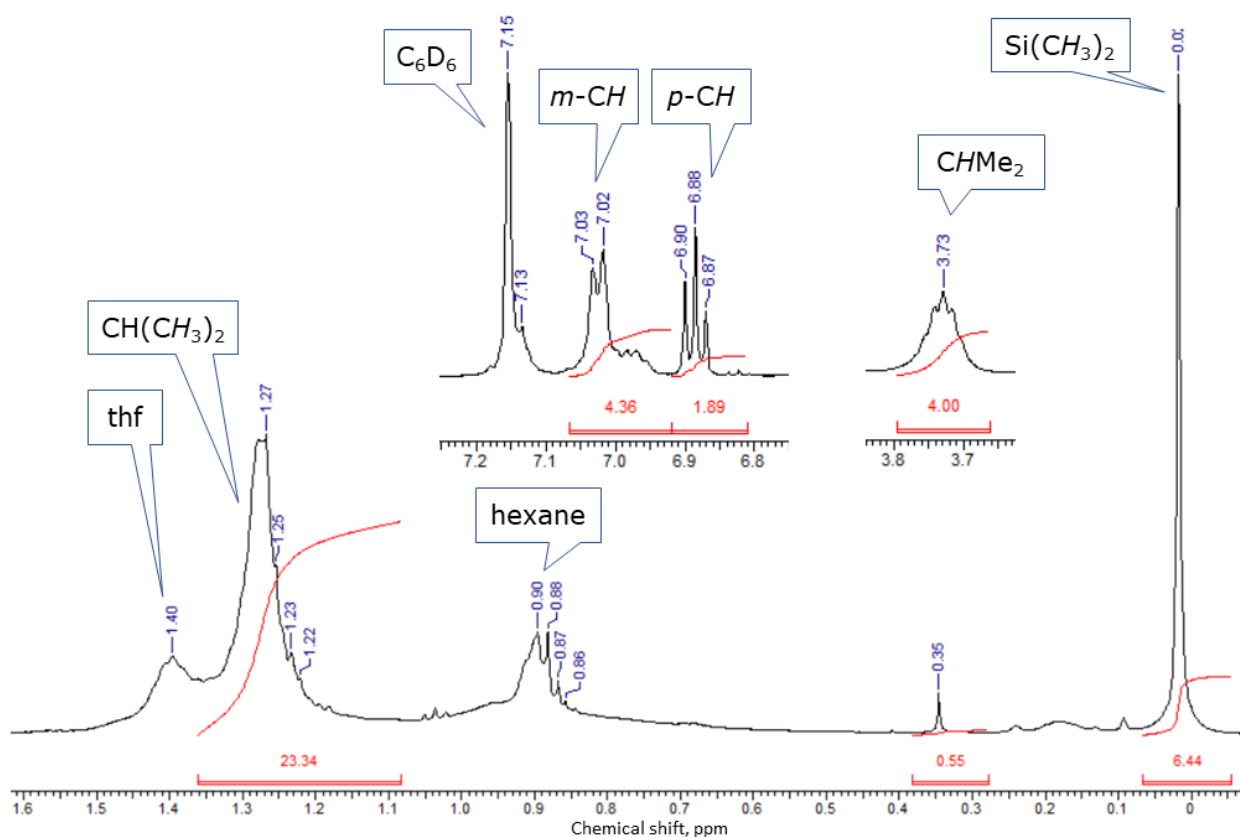

**Figure S1**  $^1\text{H}$  NMR spectrum of the product of the reaction of  $\text{H}_2\text{L}^{\text{Dipp}}$  with  $n\text{-BuLi}$  in hexane,  $\text{C}_6\text{D}_6$ .

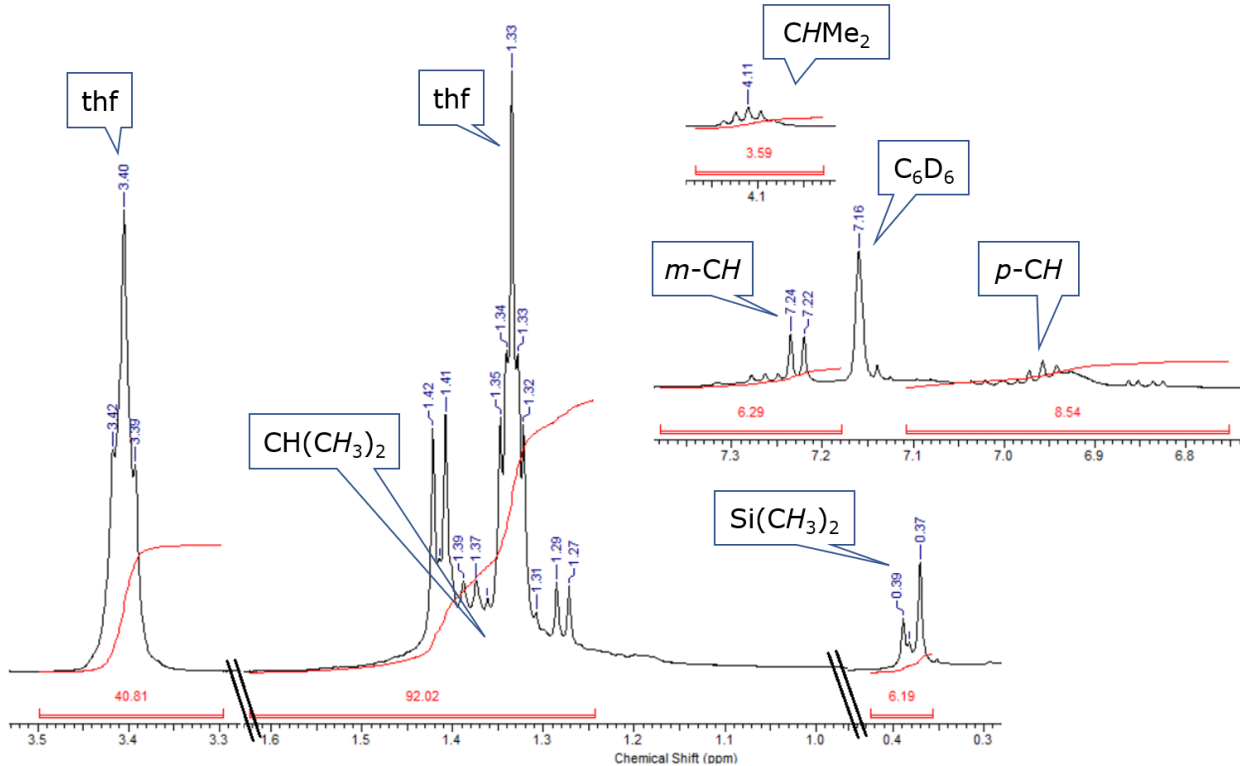

**Figure S2**  $^1\text{H}$  NMR spectrum of the product of the reaction of  $\text{H}_2\text{L}^{\text{Dipp}}$  with  $n\text{-BuLi}$  in thf; the several signals corresponding to the same groups are conditioned by the non-equivalence of Dipp substituents due to the coordination of thf.

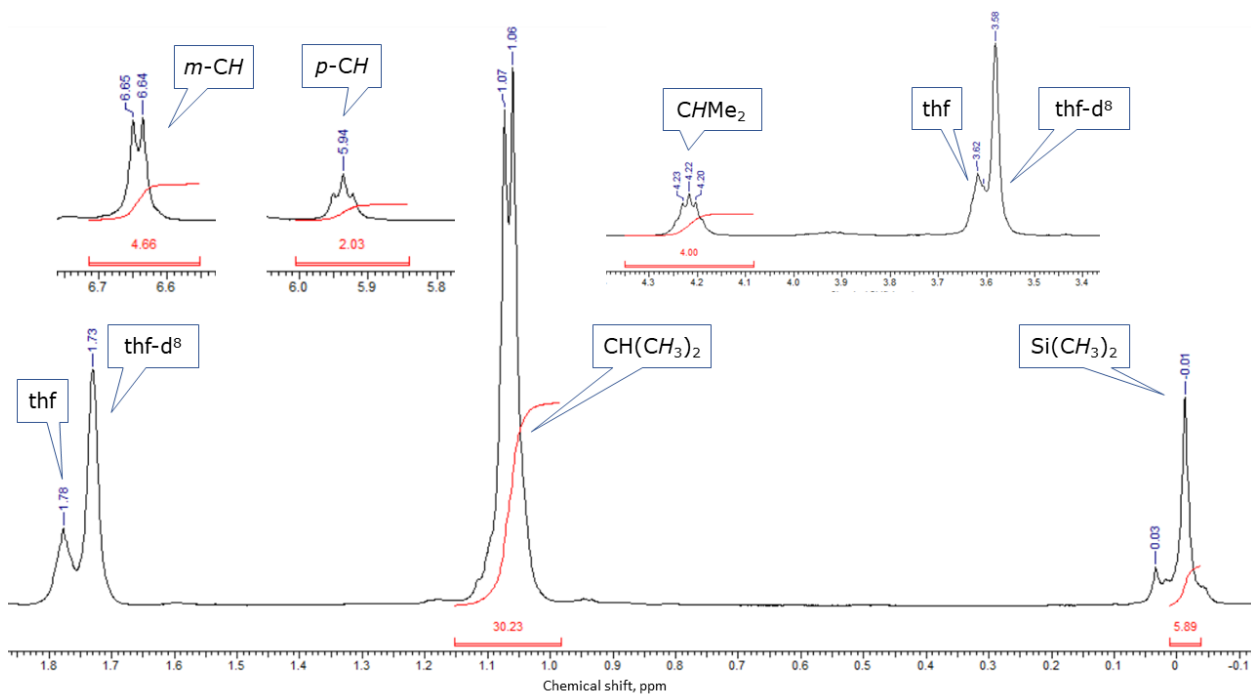

**Figure S3**  $^1\text{H}$  NMR spectrum of  $\text{K}_2\text{L}^{\text{Dipp}}$  in  $\text{thf-d}_8$ : the salt was obtained by the reaction of  $\text{KH}$  and proligand in THF.

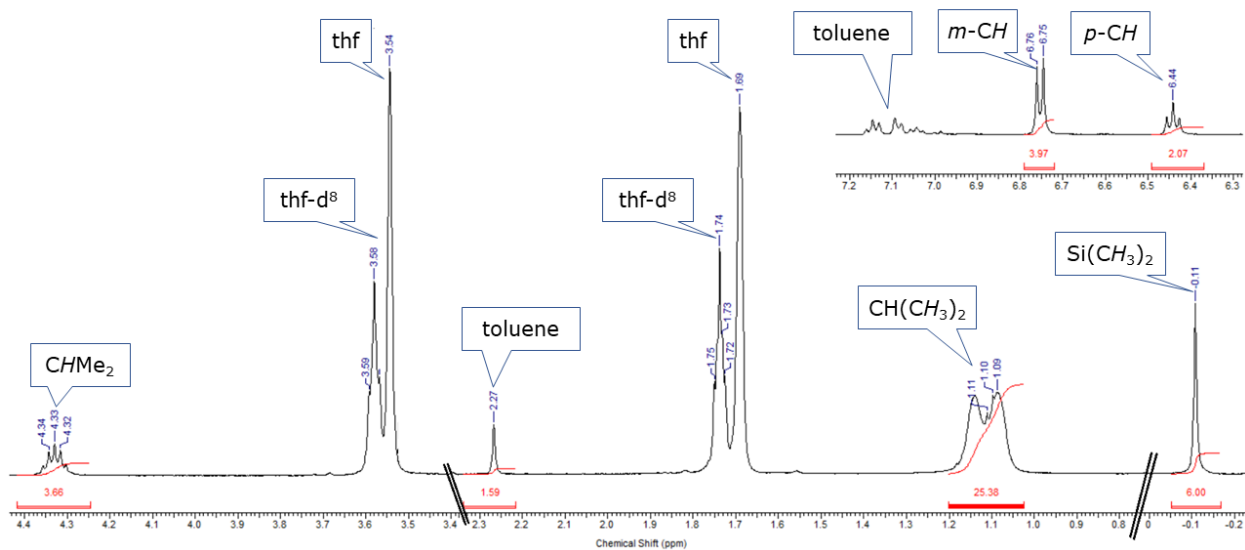

**Figure S4**  $^1\text{H}$  NMR spectrum of  $\text{Y}^{\text{Dipp}}$  in  $\text{thf-d}_8$ .

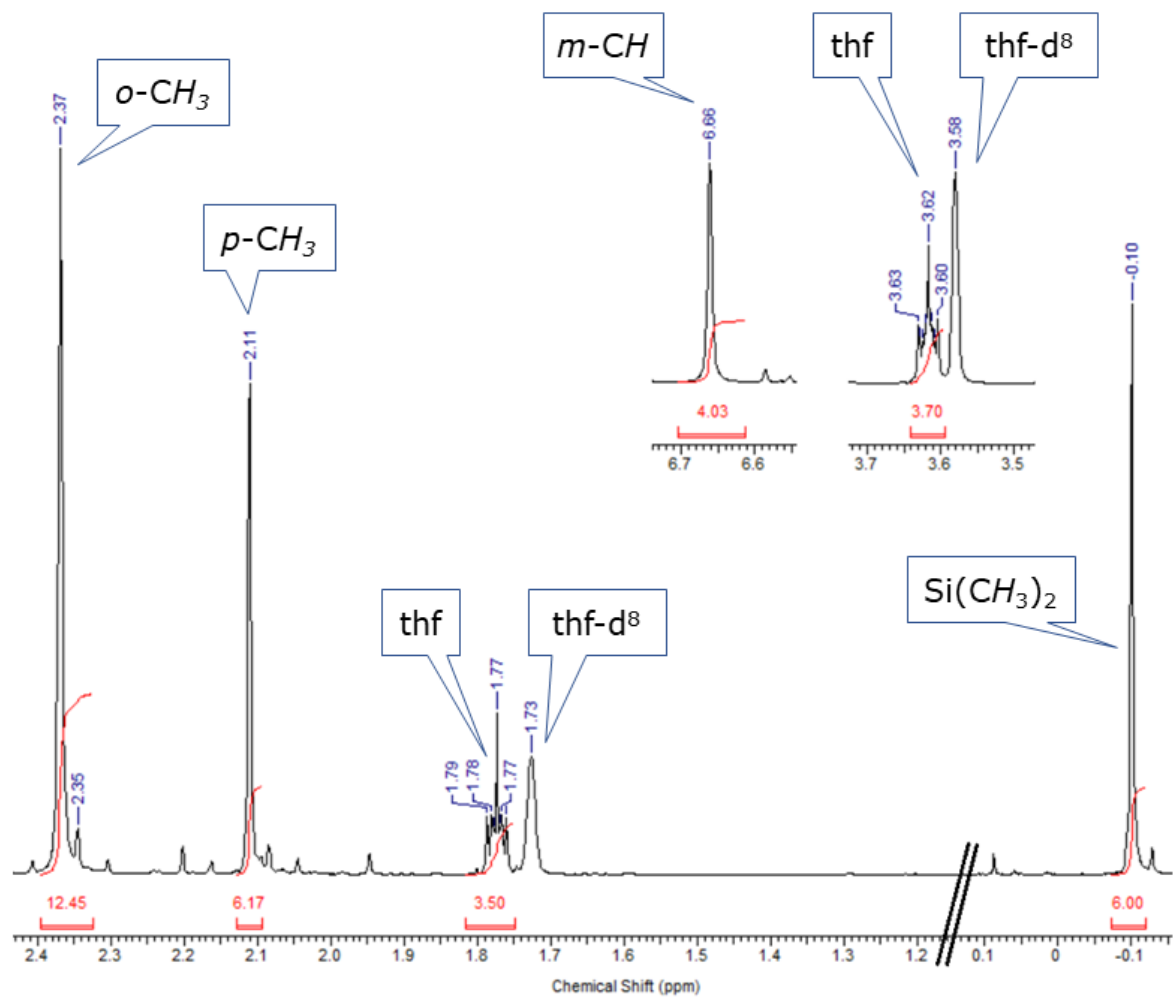

Figure S5  $^1\text{H}$  NMR spectrum of  $\text{Y}^{\text{Mes}}$  in  $\text{thf-d}^8$ .

### 3. Powder X-ray studies

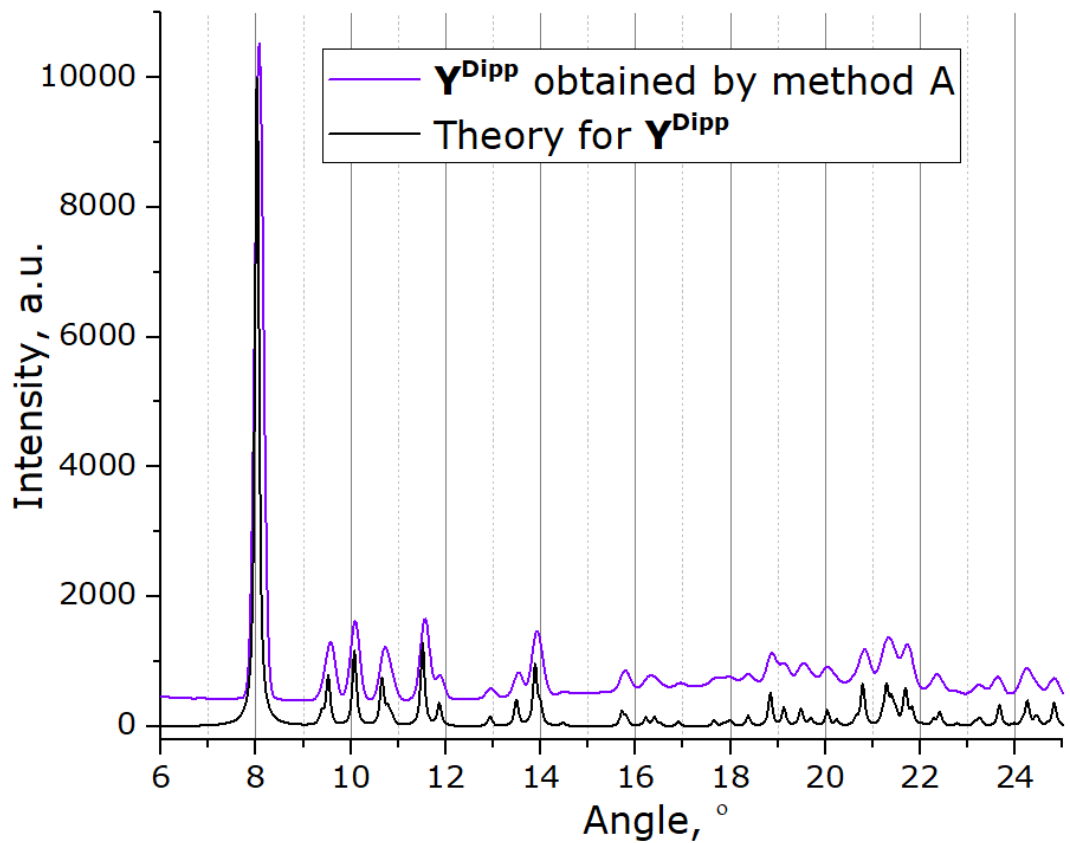

Figure S6 The experimental and simulated powder XRD patterns for  $Y^{Dipp}$  obtained by method A (Cu  $K\alpha$  radiation).

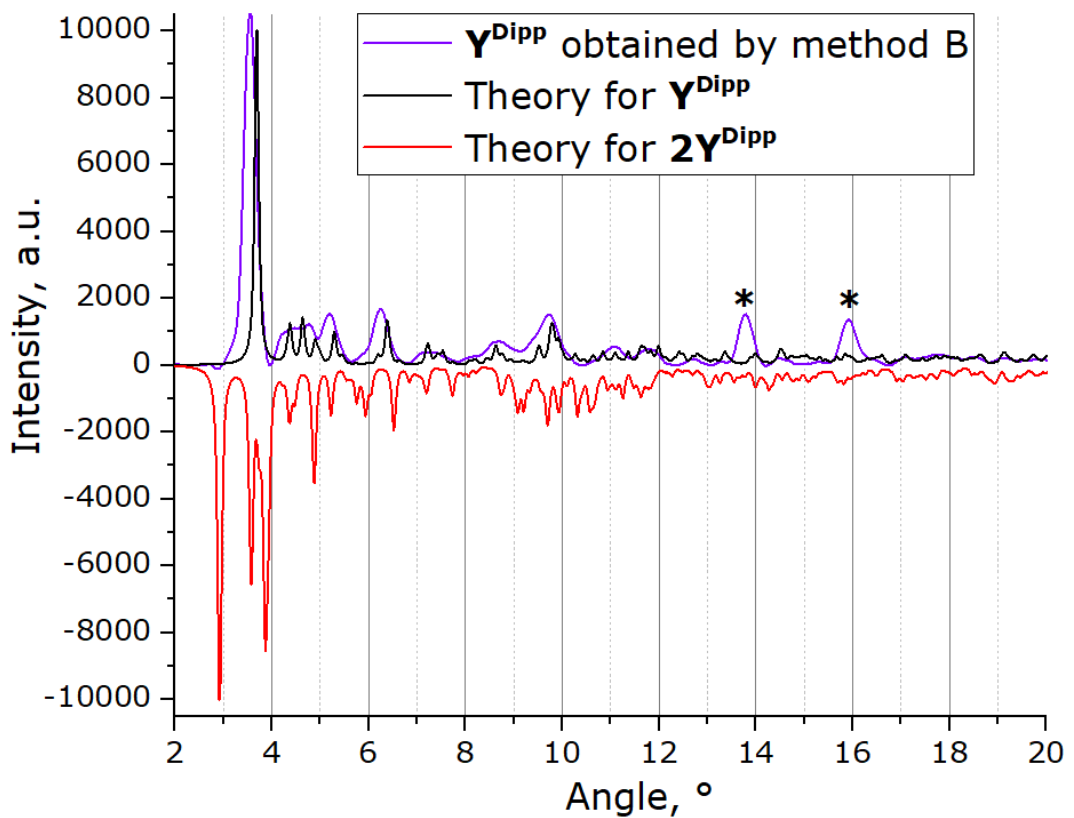

Figure S7 The experimental and simulated XRD patterns for  $Y^{Dipp}$  obtained by method B (Mo  $K\alpha$  radiation). The marked peaks are presumably attributed to LiCl.

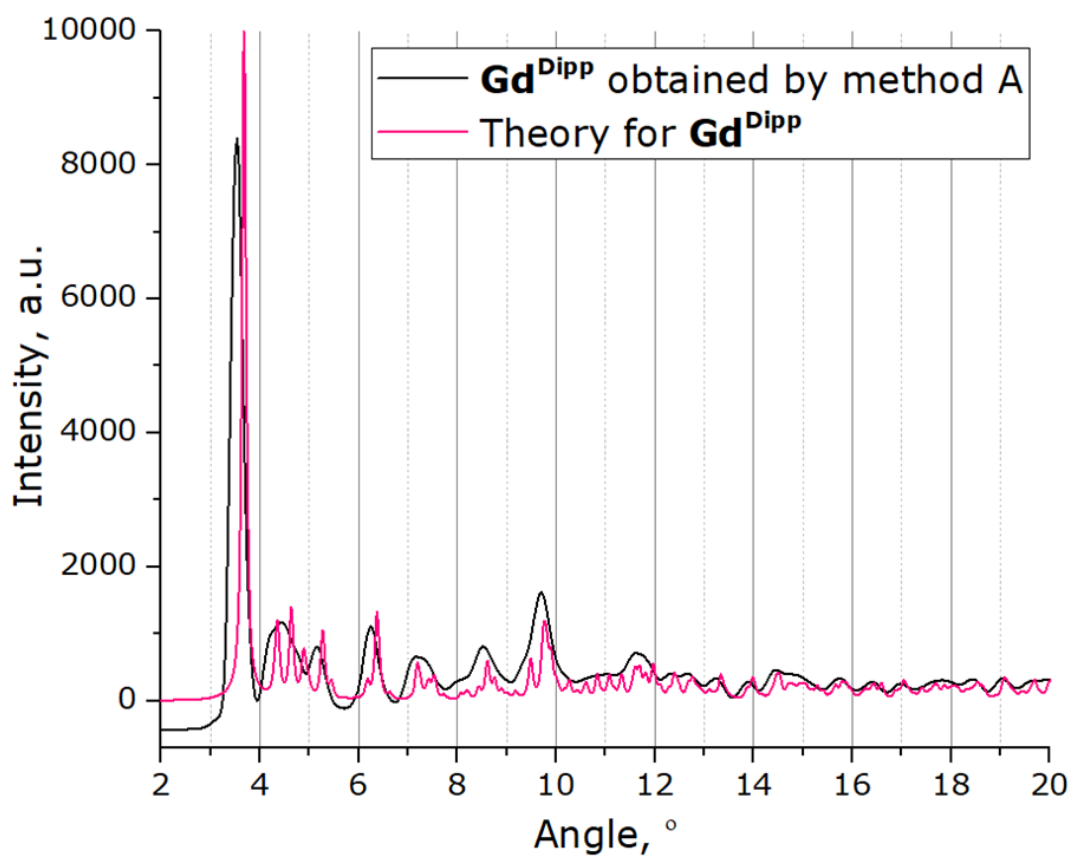

**Figure S8** The experimental and simulated XRD patterns for  $\text{Gd}^{\text{Dipp}}$  obtained by method A (Mo  $K\alpha$  radiation).

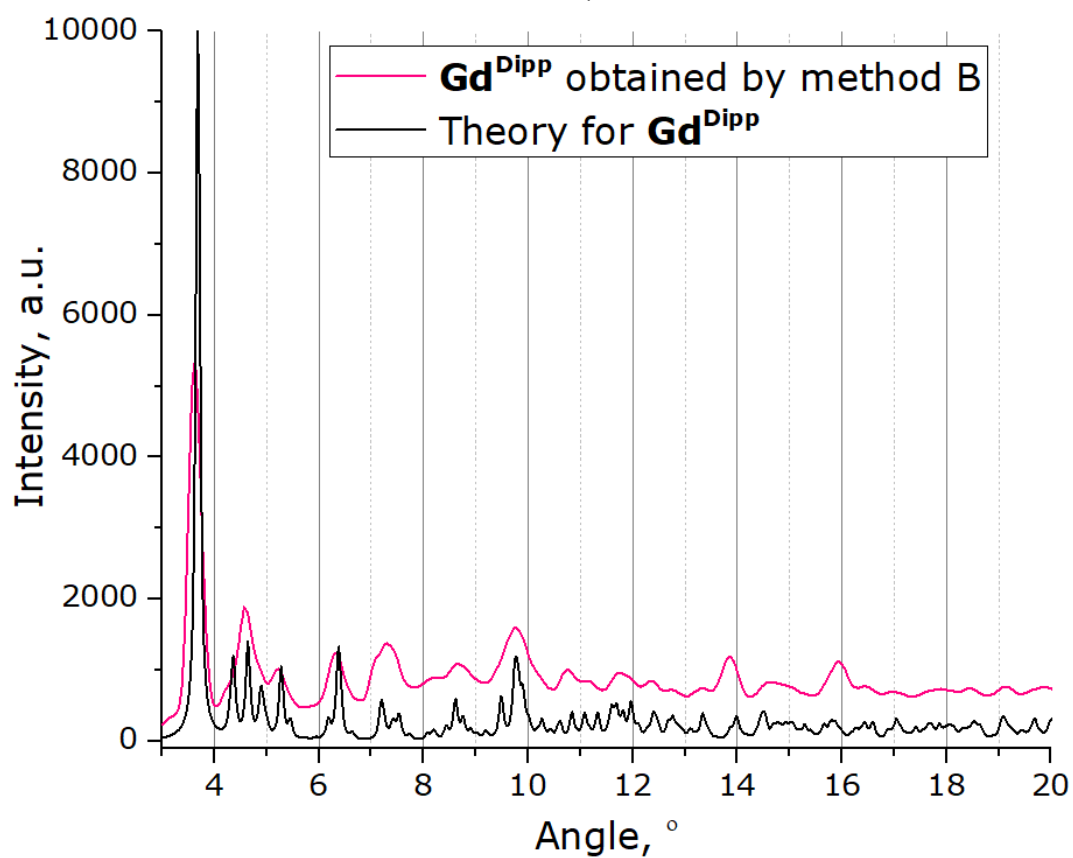

**Figure S9** The experimental and simulated XRD patterns for  $\text{Gd}^{\text{Dipp}}$  obtained by method B (Mo  $K\alpha$  radiation).

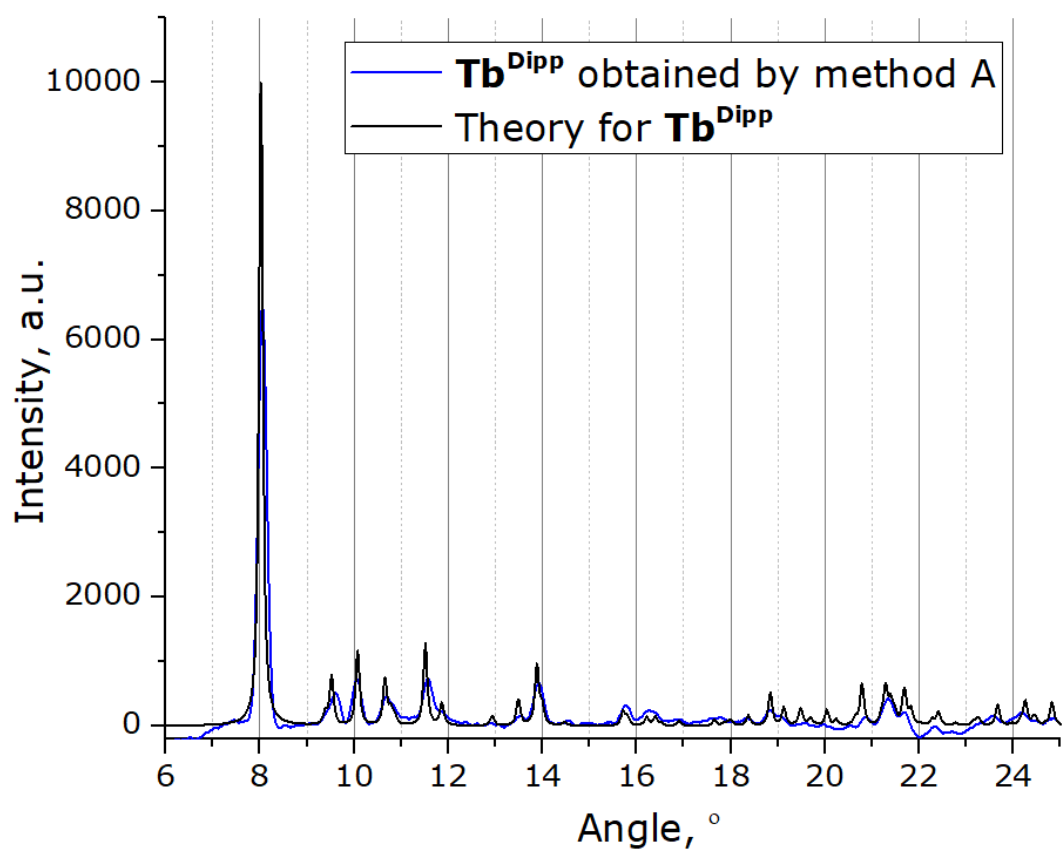

**Figure S10** The experimental and simulated XRD patterns for  $\text{Tb}^{\text{Dipp}}$  obtained by method A (Cu  $K\alpha$  radiation).

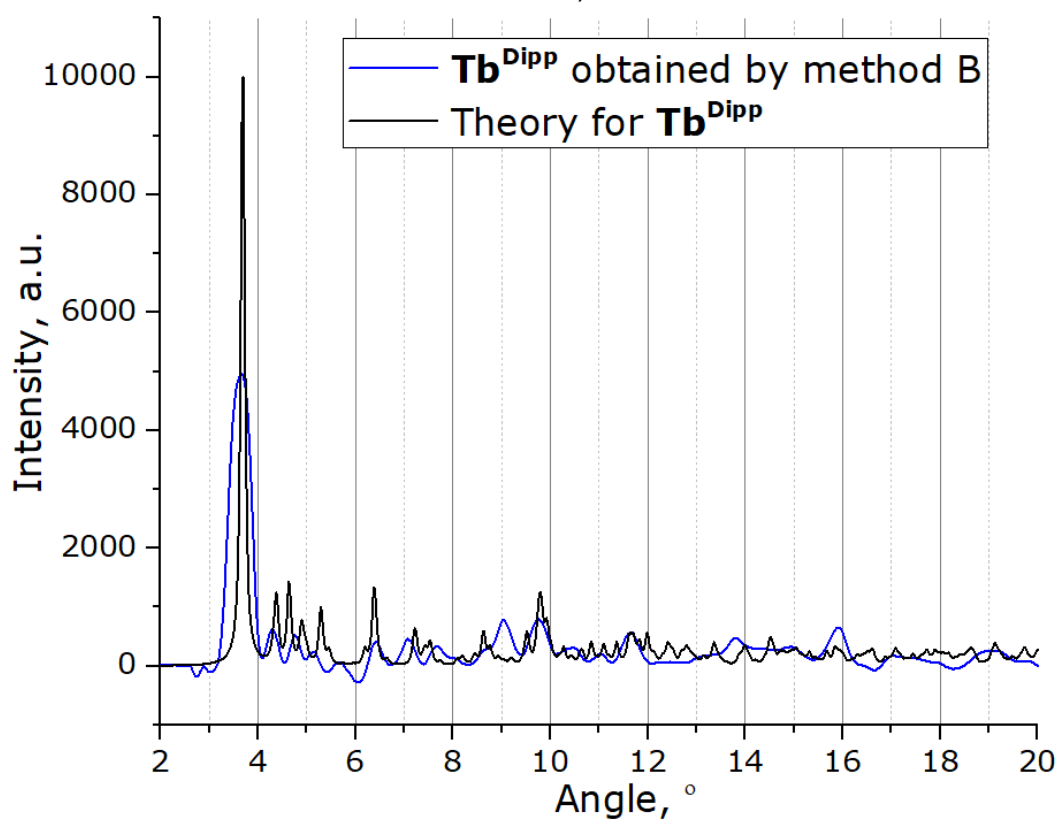

**Figure S11** The experimental and simulated XRD patterns for  $\text{Tb}^{\text{Dipp}}$  obtained by method B (Mo  $K\alpha$  radiation).



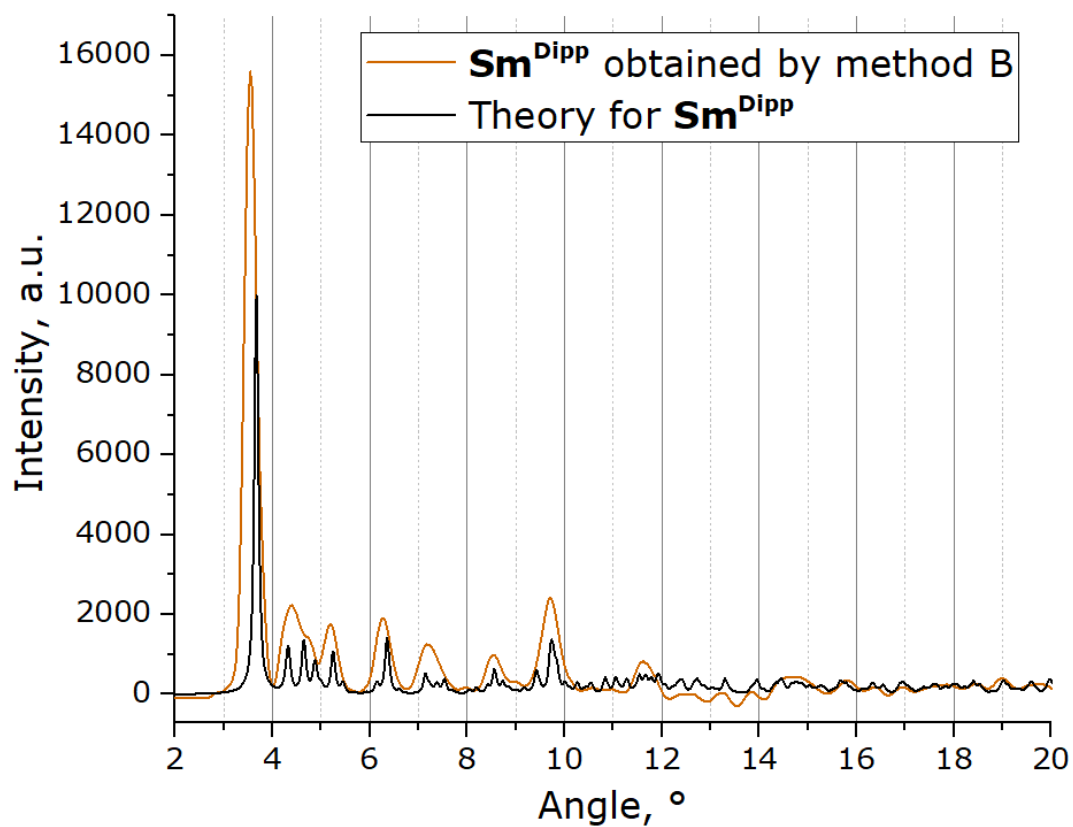

Figure S12 The experimental and simulated XRD patterns for  $\text{Sm}^{\text{Dipp}}$  obtained by method B (Mo  $K\alpha$  radiation).

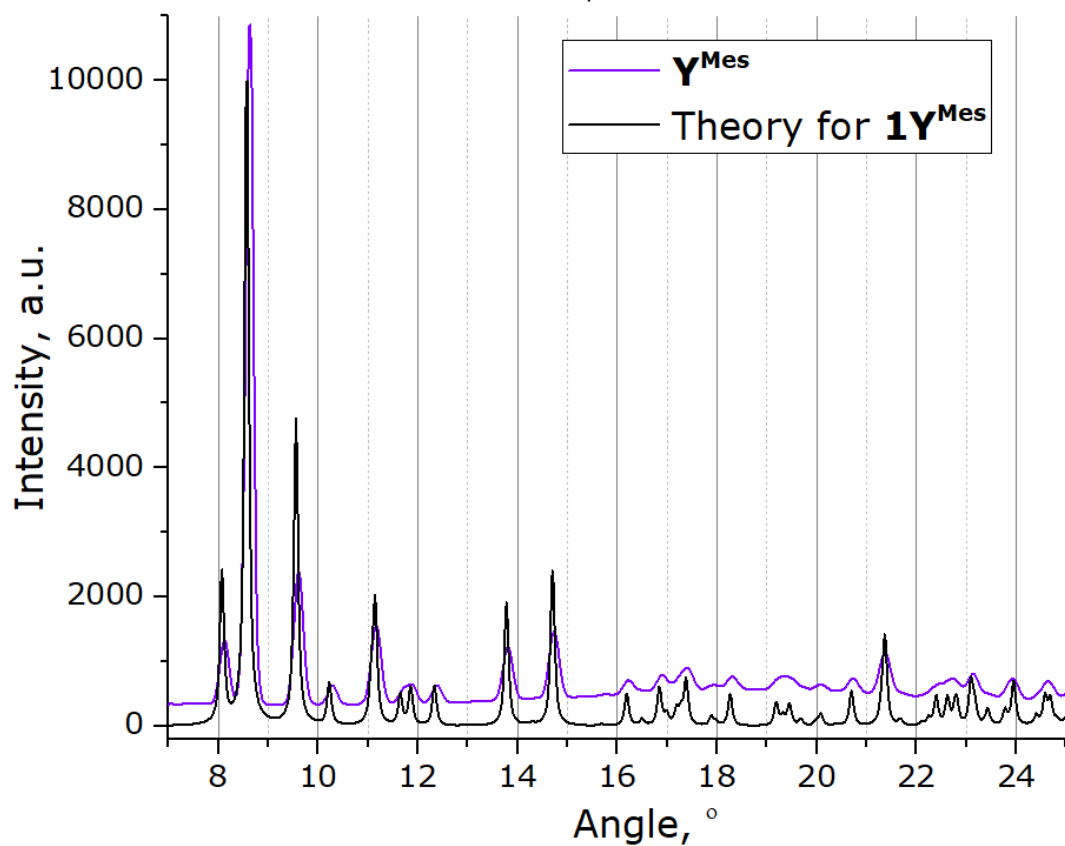

Figure S13 The experimental and simulated XRD patterns for  $\text{Y}^{\text{Mes}}$  (Cu  $K\alpha$  radiation).

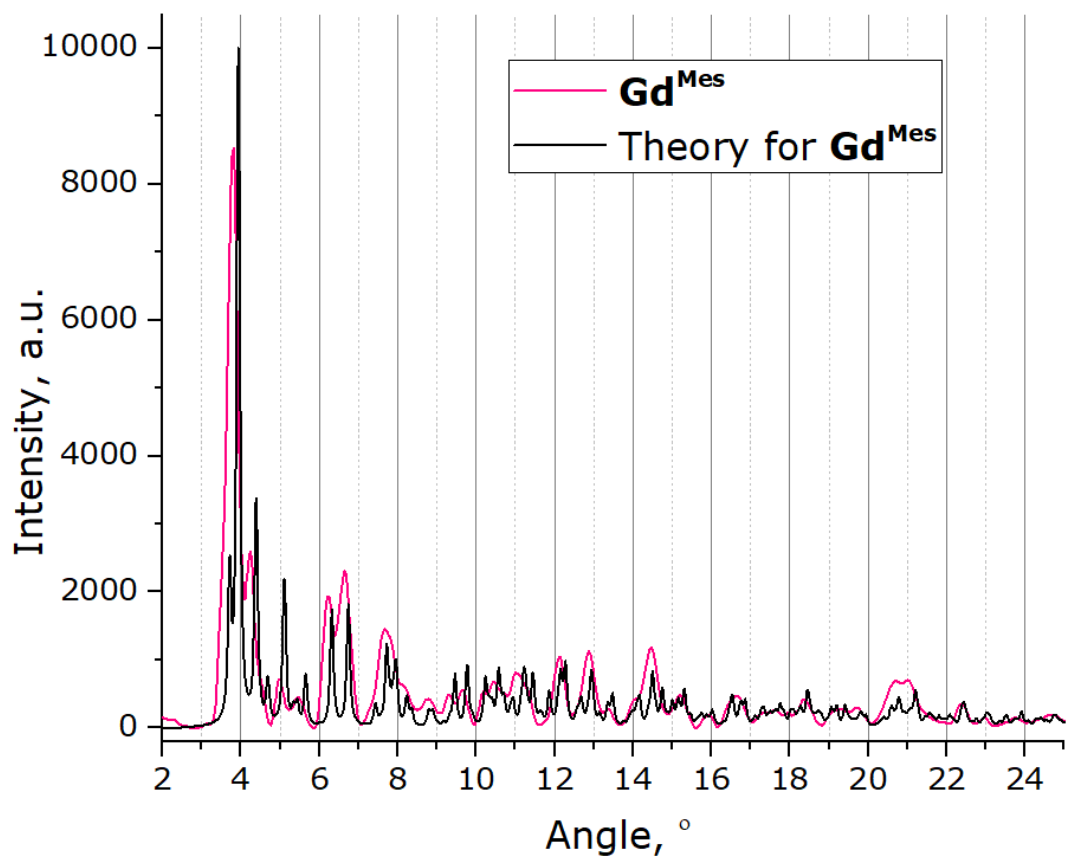

Figure S14 The experimental and simulated XRD patterns for  $\text{Gd}^{\text{Mes}}$  (Mo  $K\alpha$  radiation).

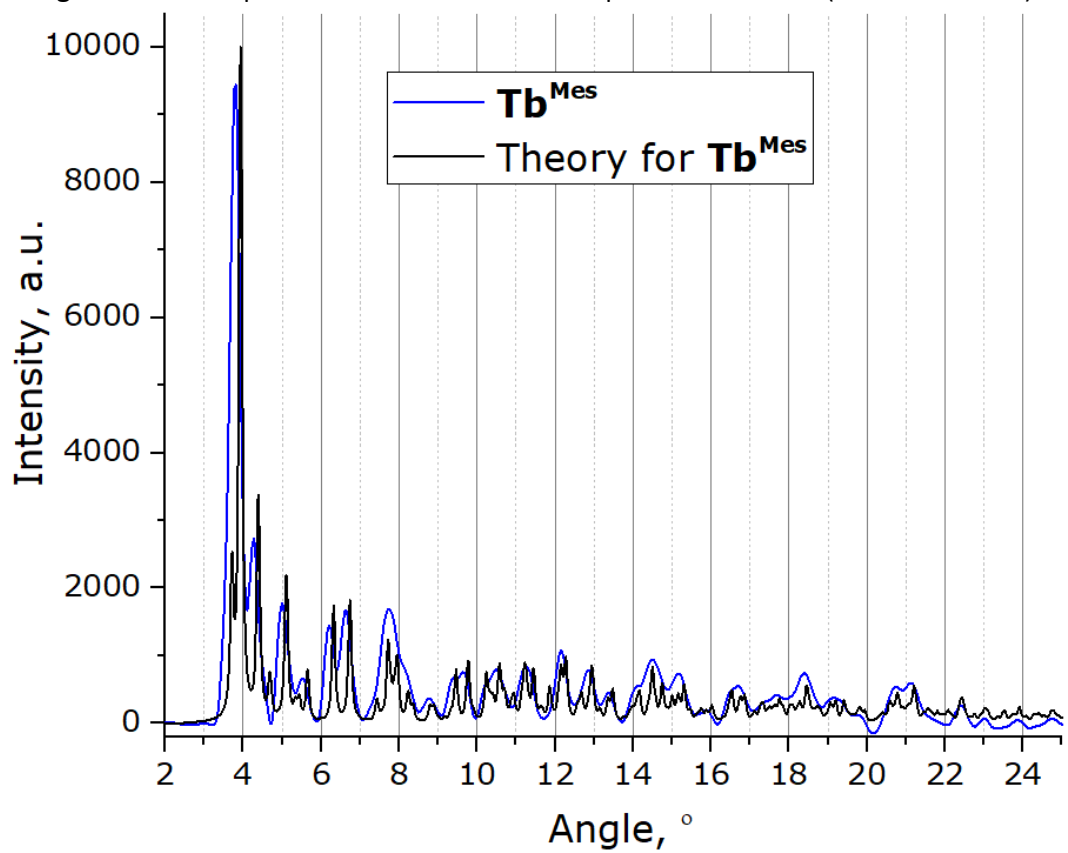

Figure S15 The experimental and simulated XRD patterns for  $\text{Tb}^{\text{Mes}}$  (Mo  $K\alpha$  radiation).

#### 4. Electronic absorption spectra

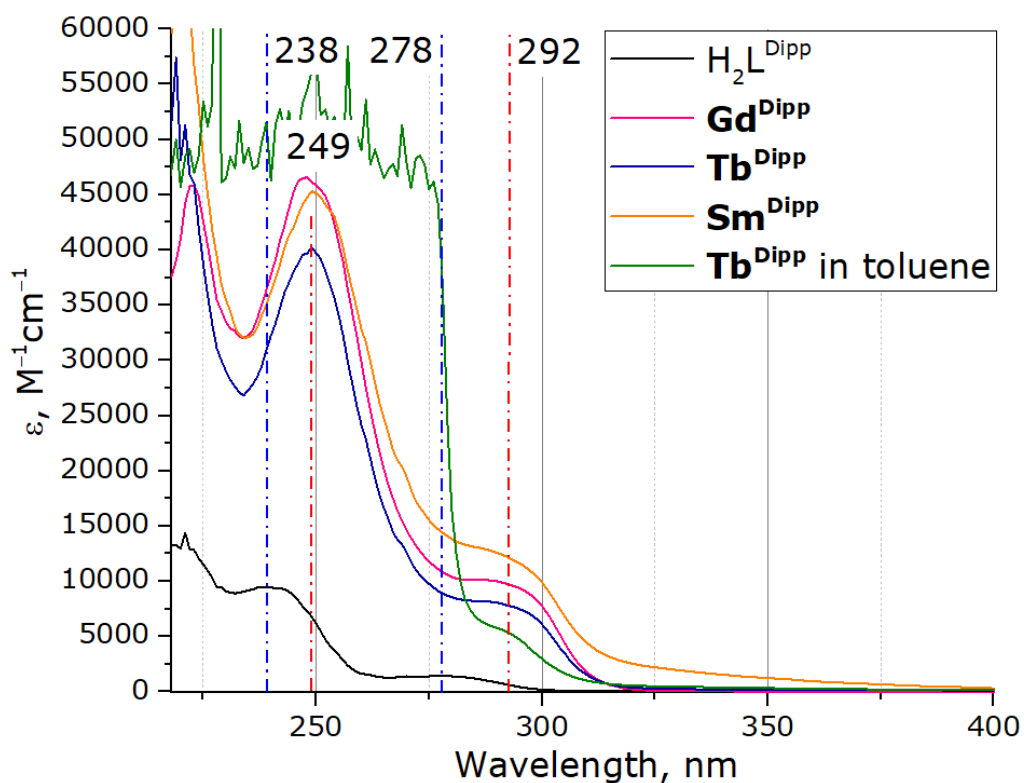

**Figure S16** Electronic absorption spectra of the proligand  $\text{H}_2\text{L}^{\text{Dipp}}$  and its lanthanide complexes in thf solutions or in toluene solution in the case of  $\text{Tb}^{\text{Dipp}}$ . For the latter, the off-scale in the UV region is conditioned by the absorption of toluene.

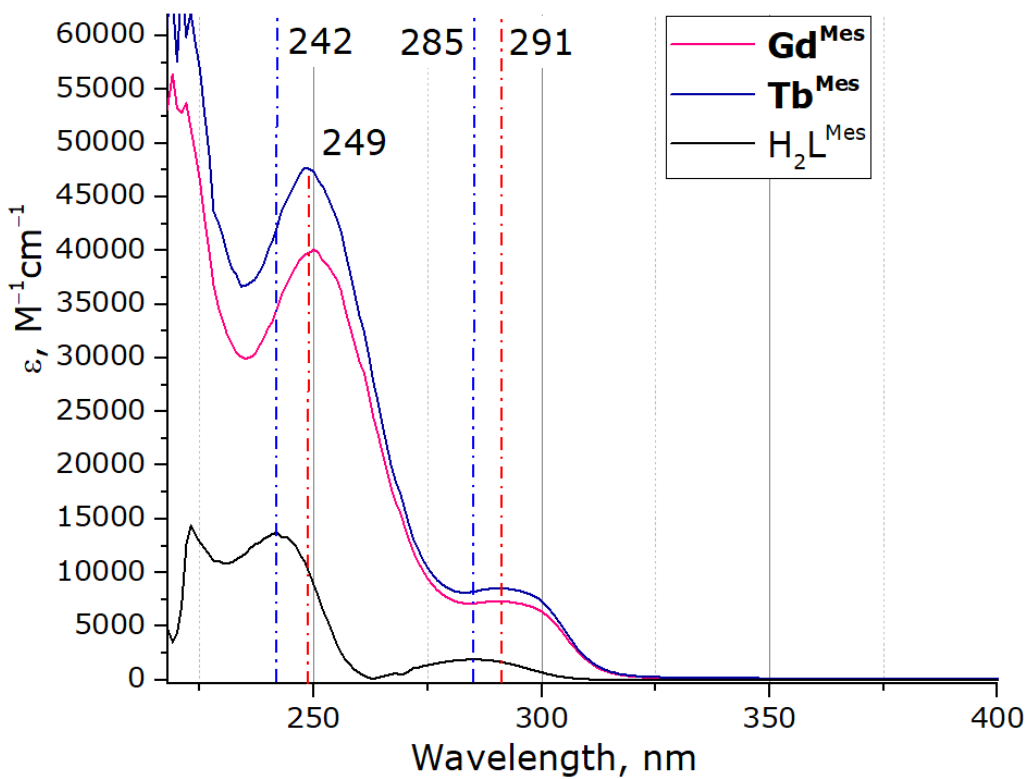

**Figure S17** Electronic absorption spectra of the proligand  $\text{H}_2\text{L}^{\text{Mes}}$  and its lanthanide complexes in thf solutions.

## 5. Luminescence study

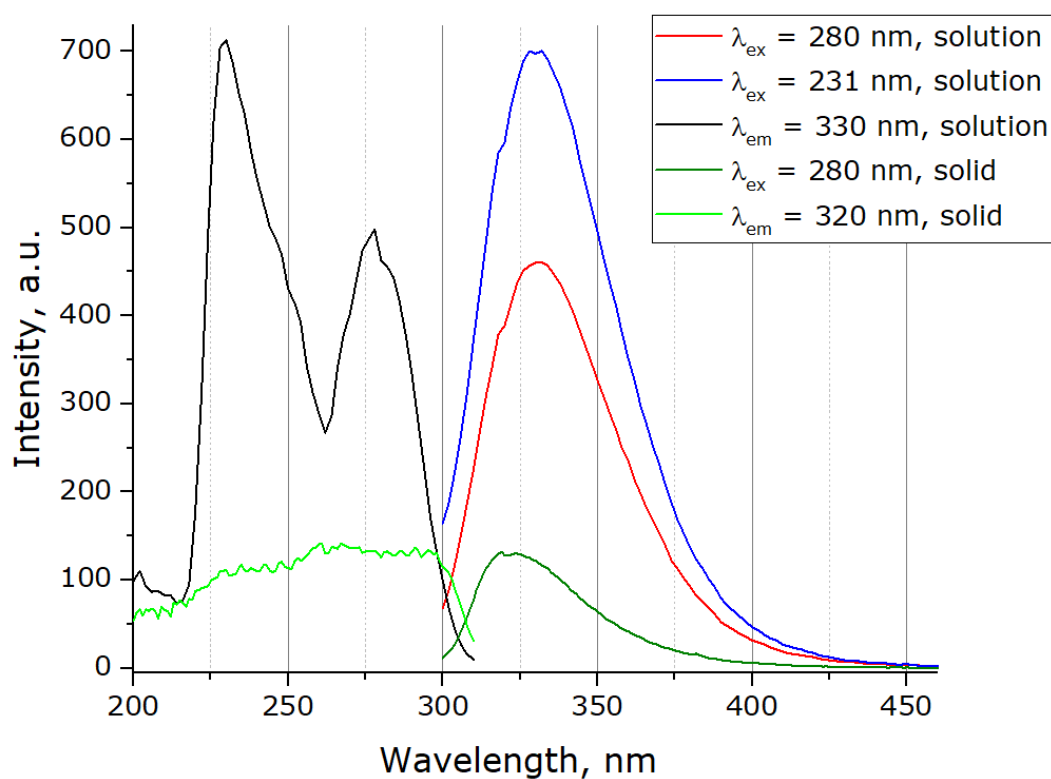

**Figure S18** Excitation (left) and emission (right) spectra of  $H_2L^{Dipp}$  in the solid state and thf solution. For the solution,  $C = 1.3 \cdot 10^{-4}$  M, 1 cm cuvette, slit widths 5x5mm. For the solid, slit widths 1.5x2.5 nm.

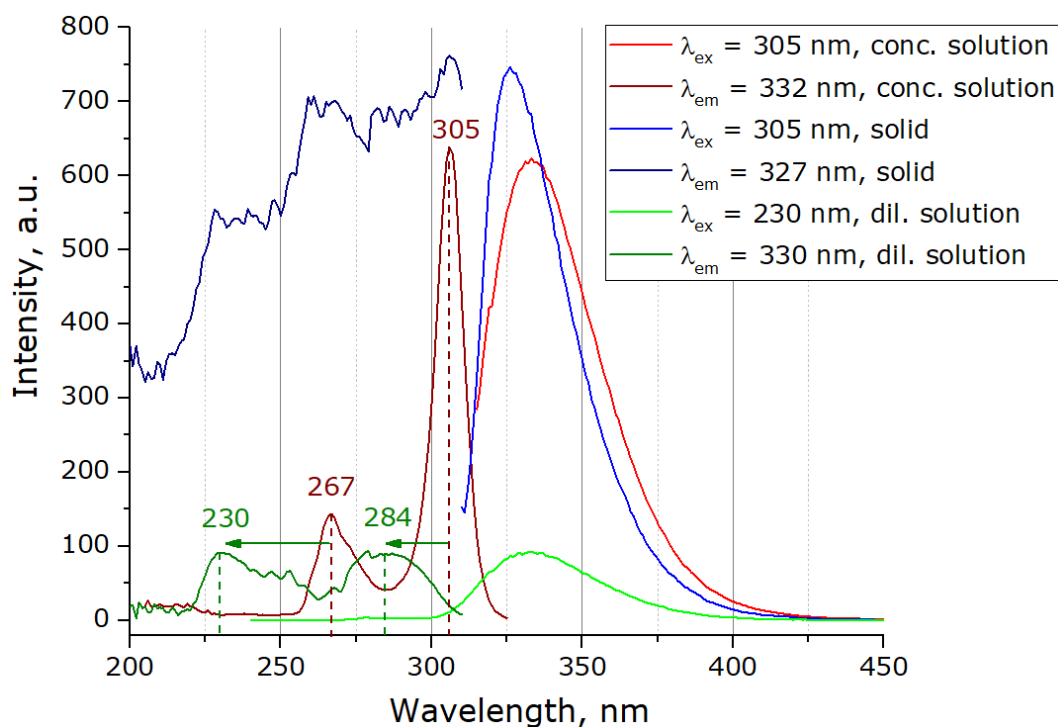

**Figure S19** Excitation (left) and emission (right) spectra of  $H_2L^{Mes}$  in the solid state and thf solutions. For the concentrated solution,  $C = 3.1 \cdot 10^{-3}$  M; for the diluted solution,  $C = 1.3 \cdot 10^{-4}$  M; 1 cm cuvette. Slit widths 2.5x2.5 nm.

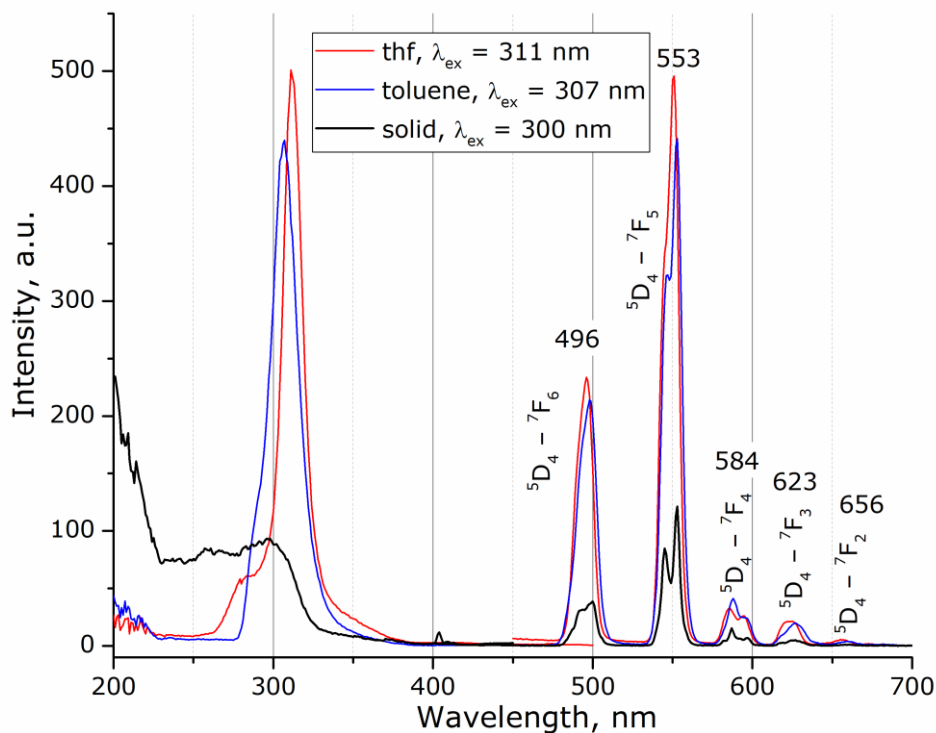

**Figure S20** Excitation (left) and emission (right) spectra of  $\text{Tb}^{\text{Dipp}}$  in the solid state and thf and toluene solutions. For the solution, 1 cm cuvette,  $C(\text{thf}) = 6.9 \cdot 10^{-4}$  M,  $C(\text{toluene}) = 6.7 \cdot 10^{-4}$  M. Slit widths  $5 \times 5$  nm for solutions,  $2.5 \times 2.5$  nm for solid.

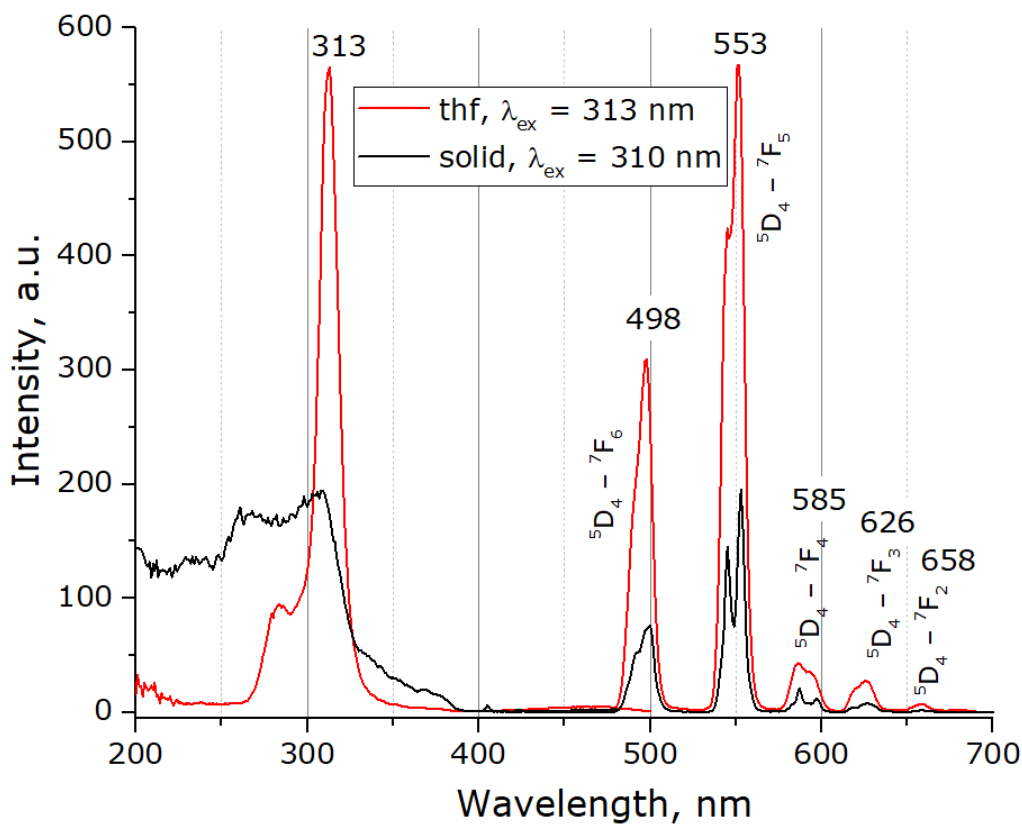

**Figure S21** Excitation (left) and emission (right) spectra of  $\text{Tb}^{\text{Mes}}$  in the solid state and thf solution. For the solution, 1 cm cuvette, slit widths  $5 \times 5$  nm,  $C = 6.0 \cdot 10^{-4}$  M. For the solid, slit widths  $2.5 \times 2.5$  nm.

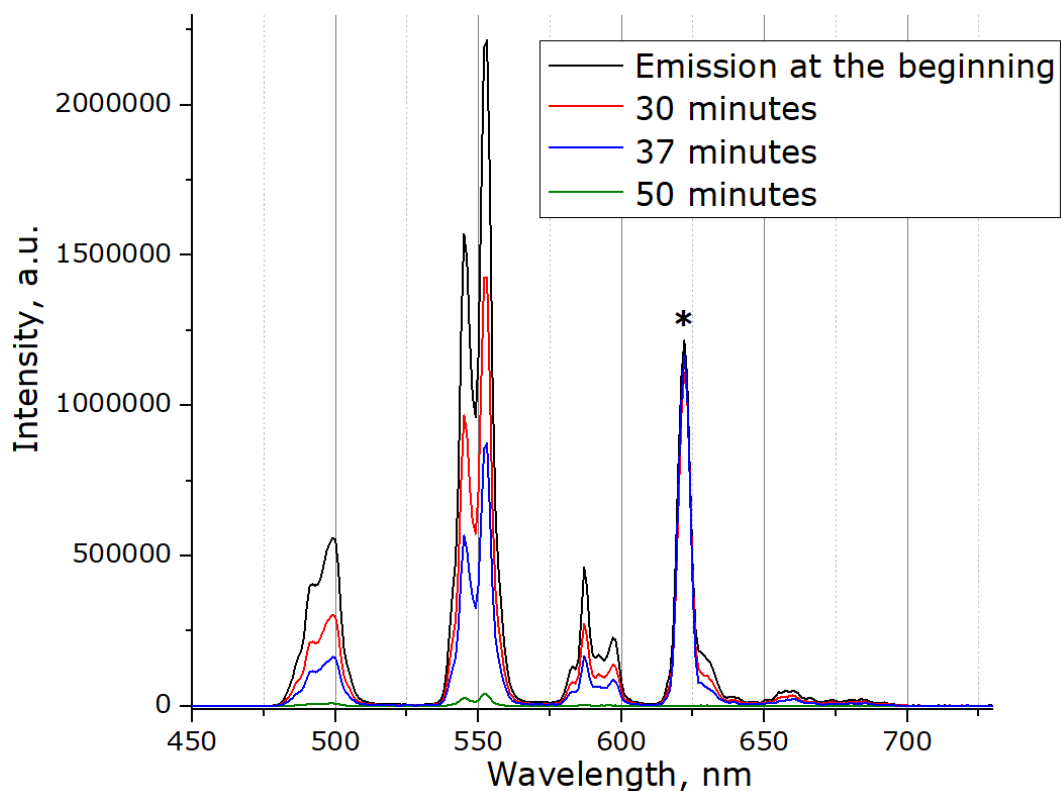

**Figure S22** Decreasing emission of the solid sample  $\text{Tb}^{\text{Dipp}}$  during aging ( $\lambda_{\text{em}} = 310 \text{ nm}$ ). The band marked with \* corresponds to the second-order diffraction artifact.

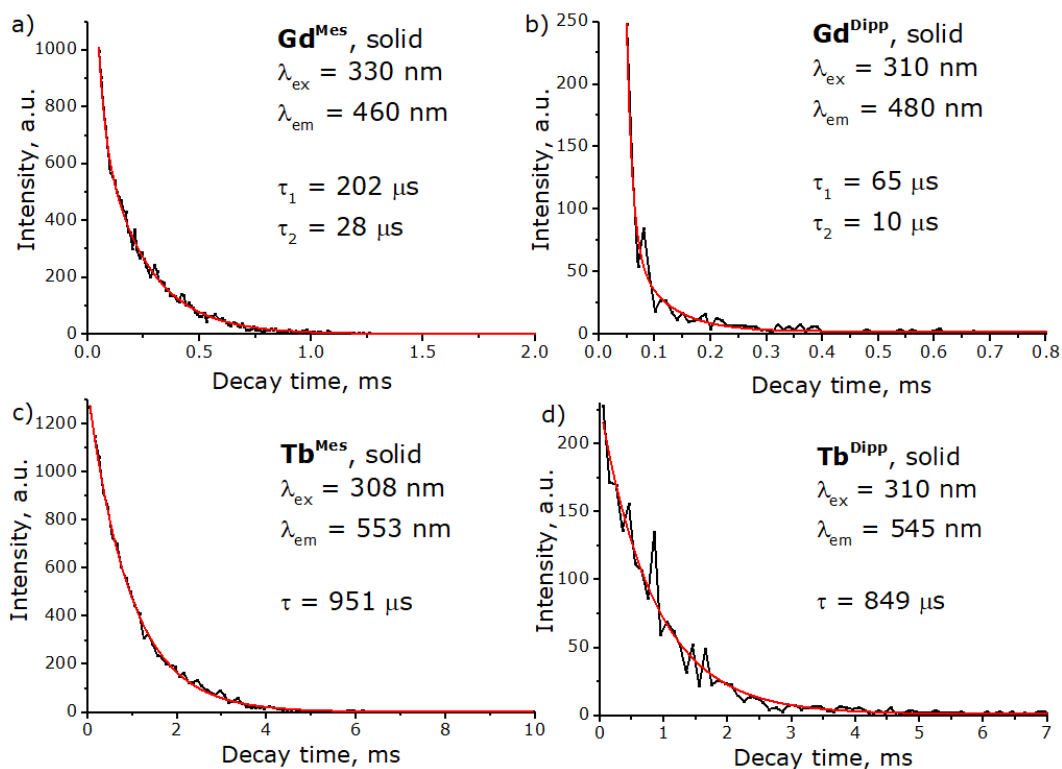

**Figure S23** Emission decay curves of solid samples of  $\text{Ln}^{\text{Dipp}}$  and  $\text{Ln}^{\text{Mes}}$  ( $\text{Ln} = \text{Gd}, \text{Tb}$ ).

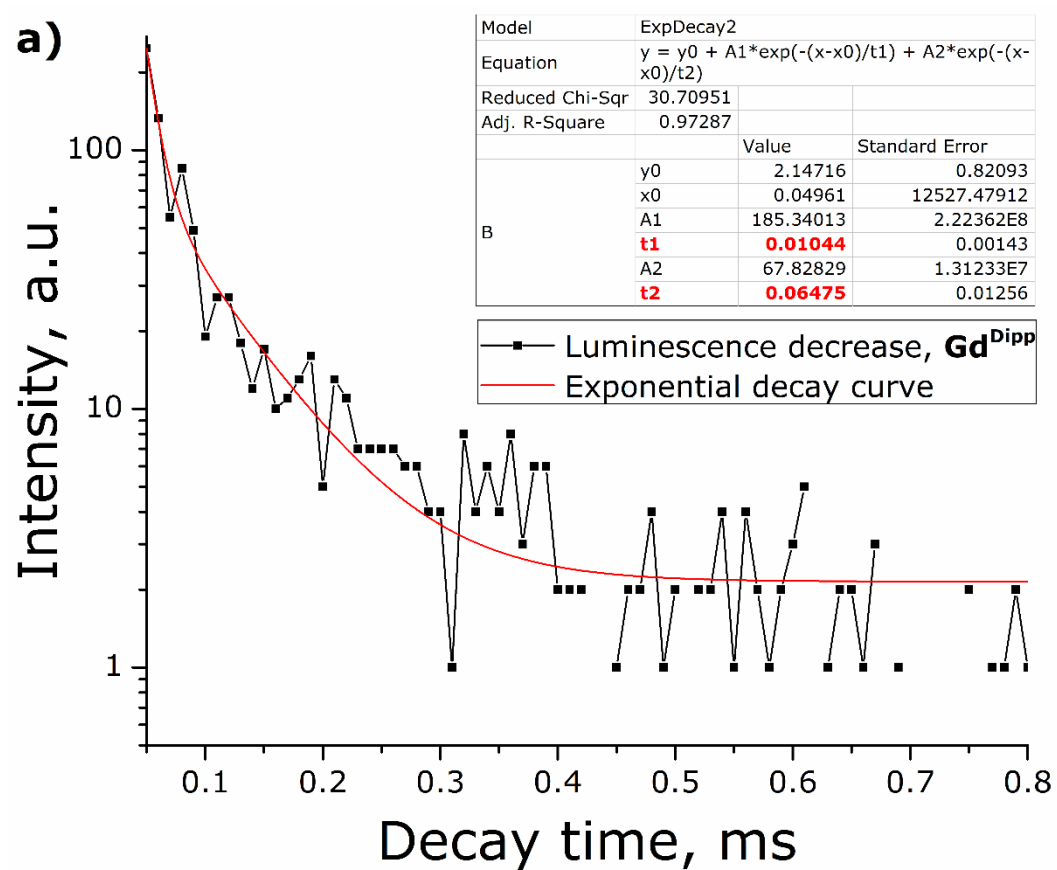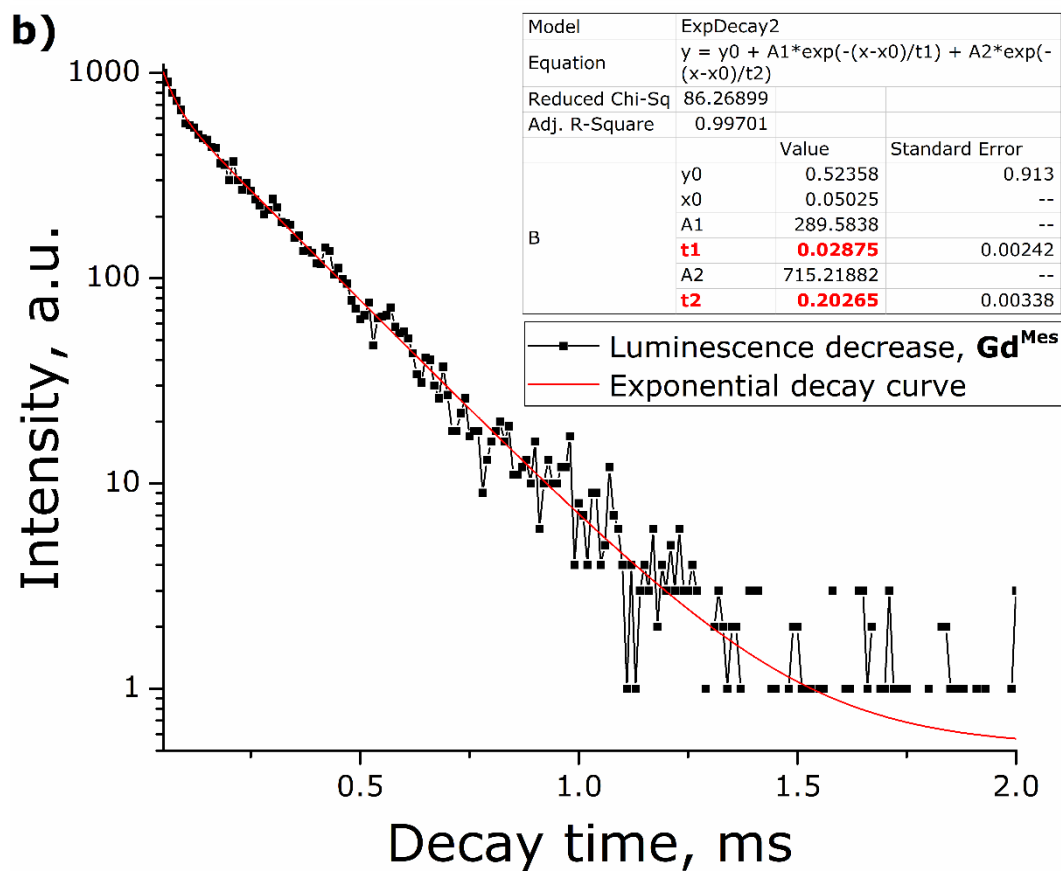

Figure S24 Emission decay curves of solid samples of a) **Gd<sup>Dipp</sup>** and b) **Gd<sup>Mes</sup>** (logarithmic scale).

## 6. Photos of the samples

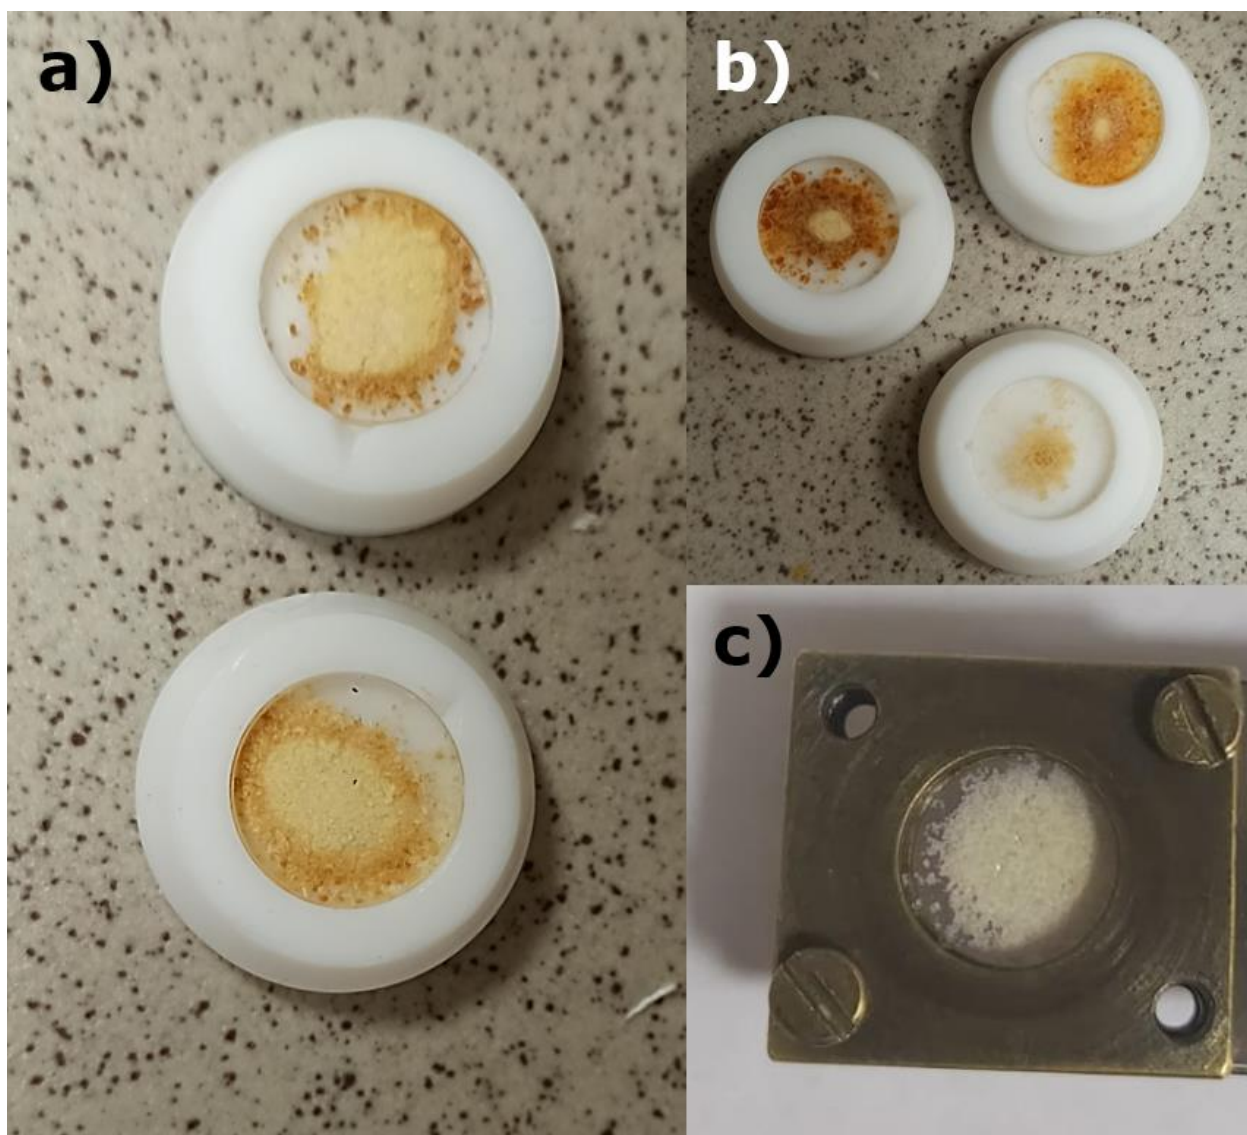

**Figure S25** Photos showing degradation of samples of the complexes for the luminescent studies in air visually observed as darkening of the sample edges. a) samples in Teflon cuvettes covered with glass after 15 min, b) after 30 minutes; c) no degradation of the sample placed in a two-wall glass cuvette for low-temperature measurements.
